# Supplementary material
Source: PubMed Central journal article supplement (PMC8415436)
Supplement: NIHMS1734196-supplement-supplemental_file.pdf [file NIHMS1734196-supplement-supplemental_file.pdf]

Supplemental information for:

**Investigation of Pb-contaminated soil and road dust in a polluted area of Philadelphia**

Michael J. O'Shea<sup>1\*</sup>, Mark P.S. Krekeler<sup>2,3</sup>, David R. Vann<sup>1</sup>, Reto Gieré<sup>1,4</sup>

<sup>1</sup>*Department of Earth and Environmental Science, University of Pennsylvania, Philadelphia, PA 19104-6316, USA*

<sup>2</sup>*Department of Geology and Environmental Earth Science, Miami University Hamilton, Hamilton, OH 45011, USA*

<sup>3</sup>*Department of Geology and Environmental Earth Science, Miami University, Oxford, OH 45056, USA*

<sup>4</sup>*Center of Excellence in Environmental Toxicology, University of Pennsylvania, Philadelphia, PA 19104-6316, USA*

\*Corresponding author

Email address: [michajo@sas.upenn.edu](mailto:michajo@sas.upenn.edu)

*Environmental Monitoring and Assessment*

**Master tables containing relevant study information – available in associated Microsoft Excel files**

**Table S1a:** Road Dust: Master table listing all available information for each sample site.

**Table S1b:** Soil: Master table listing all available information for each sample site.

## Descriptive statistics for major elements

**Table S2a:** Descriptive statistics of the analyzed major elements found in bulk dust (top) and fine dust (bottom) (wt%). IQR stands for interquartile range.

|           | Element | Mean          | Median        | Standard  | Standard | Kurtosis | Skewness | Min           | Max           | IQR  |
|-----------|---------|---------------|---------------|-----------|----------|----------|----------|---------------|---------------|------|
|           |         | Concentration | Concentration | Deviation | Error    |          |          | Concentration | Concentration |      |
| Bulk Dust | Na      | 0.60          | 0.40          | 0.82      | 0.18     | 10.76    | 3.10     | 0.03          | 3.67          | 0.32 |
|           | Mg      | 1.33          | 1.32          | 0.44      | 0.10     | -0.39    | 0.34     | 0.63          | 2.23          | 0.58 |
|           | Al      | 0.34          | 0.32          | 0.07      | 0.02     | 0.61     | 0.92     | 0.26          | 0.51          | 0.09 |
|           | P       | 0.06          | 0.05          | 0.02      | 0.00     | -0.18    | 0.58     | 0.03          | 0.09          | 0.02 |
|           | K       | 0.17          | 0.14          | 0.13      | 0.03     | 2.90     | 1.80     | 0.06          | 0.55          | 0.09 |
|           | Ca      | 3.42          | 3.24          | 0.88      | 0.20     | -0.68    | 0.19     | 1.87          | 5.01          | 1.10 |
|           | Ti      | 0.04          | 0.05          | 0.02      | 0.00     | -0.59    | -0.18    | 0.01          | 0.07          | 0.03 |
|           | Fe      | 3.35          | 3.34          | 1.36      | 0.30     | 1.83     | 1.12     | 1.16          | 6.81          | 1.41 |
| Fine Dust | Na      | 0.07          | 0.07          | 0.02      | 0.00     | 6.66     | 2.04     | 0.04          | 0.13          | 0.02 |
|           | Mg      | 2.39          | 2.40          | 0.88      | 0.20     | 0.22     | 0.31     | 0.96          | 4.48          | 1.13 |
|           | Al      | 0.44          | 0.42          | 0.09      | 0.02     | 2.97     | 1.42     | 0.33          | 0.70          | 0.10 |
|           | P       | 0.10          | 0.10          | 0.02      | 0.01     | 0.56     | 1.03     | 0.07          | 0.16          | 0.03 |
|           | K       | 0.07          | 0.07          | 0.02      | 0.00     | 0.23     | 0.96     | 0.05          | 0.12          | 0.02 |
|           | Ca      | 5.52          | 5.66          | 1.84      | 0.41     | 1.94     | 0.88     | 3.00          | 10.71         | 2.13 |
|           | Ti      | 0.07          | 0.06          | 0.02      | 0.01     | -0.32    | 0.43     | 0.03          | 0.12          | 0.03 |
|           | Fe      | 3.41          | 3.36          | 1.21      | 0.27     | -0.18    | 0.57     | 1.51          | 5.95          | 1.47 |

**Table S2b:** Descriptive statistics of the analyzed major elements found in bulk soil (top) and fine soil (bottom) (wt%). IQR stands for interquartile range.

|           | Element | Mean          | Median        | Standard  | Standard | Kurtosis | Skewness | Min           | Max           | IQR  |
|-----------|---------|---------------|---------------|-----------|----------|----------|----------|---------------|---------------|------|
|           |         | Concentration | Concentration | Deviation | Error    |          |          | Concentration | Concentration |      |
| Bulk Soil | Na      | 0.15          | 0.13          | 0.15      | 0.03     | -0.24    | 0.90     | 0.02          | 0.48          | 0.20 |
|           | Mg      | 0.67          | 0.47          | 0.52      | 0.12     | 0.58     | 1.19     | 0.13          | 2.00          | 0.79 |
|           | Al      | 0.60          | 0.53          | 0.16      | 0.04     | -1.26    | 0.24     | 0.35          | 0.89          | 0.26 |
|           | P       | 0.22          | 0.20          | 0.10      | 0.02     | 0.01     | 0.59     | 0.07          | 0.45          | 0.12 |
|           | K       | 0.11          | 0.10          | 0.05      | 0.01     | -0.20    | 0.78     | 0.03          | 0.23          | 0.08 |
|           | Ca      | 1.76          | 1.52          | 1.25      | 0.28     | 0.11     | 1.00     | 0.22          | 4.67          | 1.52 |
|           | Ti      | 0.04          | 0.03          | 0.01      | 0.00     | -0.54    | 0.29     | 0.01          | 0.06          | 0.03 |
|           | Fe      | 2.48          | 2.43          | 0.87      | 0.19     | 3.10     | 1.42     | 1.24          | 5.08          | 0.73 |
| Fine Soil | Na      | 0.14          | 0.08          | 0.16      | 0.04     | 2.55     | 1.8      | 0.01          | 0.56          | 0.10 |
|           | Mg      | 1.13          | 0.57          | 1.15      | 0.26     | 1.45     | 1.46     | 0.14          | 4.22          | 1.42 |
|           | Al      | 0.77          | 0.74          | 0.16      | 0.04     | -1.22    | 0.09     | 0.52          | 1.03          | 0.23 |
|           | P       | 0.28          | 0.26          | 0.11      | 0.02     | -0.78    | 0.34     | 0.11          | 0.48          | 0.17 |
|           | K       | 0.11          | 0.12          | 0.05      | 0.01     | -0.23    | 0.48     | 0.05          | 0.21          | 0.05 |
|           | Ca      | 2.66          | 1.66          | 2.44      | 0.55     | 1.44     | 1.39     | 0.17          | 9.13          | 3.19 |
|           | Ti      | 0.05          | 0.05          | 0.02      | 0.00     | 0.10     | 0.69     | 0.03          | 0.09          | 0.02 |
|           | Fe      | 2.73          | 2.43          | 0.82      | 0.18     | -0.15    | 0.84     | 1.67          | 4.62          | 0.98 |

## Descriptive statistics for minor elements

**Table S2c:** Descriptive statistics of analyzed minor elements found in bulk dust (top) and fine dust (bottom) (ppm). IQR stands for interquartile range. Cadmium, Sb, and Hg were below the detection limit (1.5, 30, and 16.5 ppm, respectively), and thus not listed.

|           | Element | Mean          | Median        | Standard  | Standard | Kurtosis | Skewness | Min           | Max           | IQR |
|-----------|---------|---------------|---------------|-----------|----------|----------|----------|---------------|---------------|-----|
|           |         | Concentration | Concentration | Deviation | Error    |          |          | Concentration | Concentration |     |
| Bulk Dust | V       | 42            | 41            | 20        | 5        | 4        | 2        | 14            | 105           | 26  |
|           | Cr      | 52            | 35            | 55        | 12       | 1        | 1        | 1             | 174           | 57  |
|           | Mn      | 23            | 21            | 15        | 3        | -1       | 1        | 0             | 55            | 16  |
|           | Co      | 8             | 5             | 10        | 2        | 12       | 3        | 2             | 46            | 3   |
|           | Ni      | 2             | 0             | 6         | 1        | 13       | 4        | 0             | 26            | 0   |
|           | Cu      | 204           | 116           | 242       | 54       | 7        | 3        | 44            | 1024          | 96  |
|           | Zn      | 331           | 328           | 115       | 26       | -1       | 1        | 122           | 542           | 181 |
|           | Sn      | 105           | 14            | 235       | 53       | 16       | 4        | 0             | 1053          | 107 |
|           | Pb      | 209           | 147           | 275       | 61       | 14       | 4        | 14            | 1293          | 198 |
| Fine Dust | V       | 66            | 57            | 26        | 6        | -1       | 1        | 31            | 116           | 36  |
|           | Cr      | 132           | 124           | 60        | 13       | -1       | 1        | 62            | 264           | 130 |
|           | Mn      | 38            | 36            | 15        | 3        | -1       | 1        | 16            | 66            | 20  |
|           | Co      | 7             | 7             | 3         | 1        | 5        | 2        | 4             | 17            | 3   |
|           | Ni      | 18            | 8             | 30        | 7        | 10       | 3        | 0             | 130           | 25  |
|           | Cu      | 242           | 241           | 96        | 22       | -1       | 1        | 127           | 444           | 162 |
|           | Zn      | 714           | 709           | 243       | 54       | 7        | 2        | 414           | 1554          | 215 |
|           | Sn      | 168           | 119           | 176       | 39       | 11       | 3        | 41            | 828           | 59  |
|           | Pb      | 287           | 269           | 155       | 35       | 1        | 1        | 92            | 652           | 170 |

**Table S2d:** Descriptive statistics of analyzed minor elements found in bulk soil (top) and fine soil (bottom) (ppm). IQR stands for interquartile range. Cadmium, Sb, and Hg were below the detection limit (1.5, 30, and 16.5 ppm, respectively), and thus not listed.

|           | Element | Mean          | Median        | Standard  | Standard | Kurtosis | Skewness | Min           | Max           | IQR |
|-----------|---------|---------------|---------------|-----------|----------|----------|----------|---------------|---------------|-----|
|           |         | Concentration | Concentration | Deviation | Error    |          |          | Concentration | Concentration |     |
| Bulk Soil | V       | 31            | 29            | 10        | 2        | -1       | 1        | 13            | 51            | 13  |
|           | Cr      | 42            | 31            | 30        | 7        | 7        | 2        | 18            | 146           | 26  |
|           | Mn      | 42            | 38            | 28        | 6        | -1       | 1        | 0             | 99            | 33  |
|           | Co      | 6             | 6             | 2         | 1        | 1        | 1        | 1             | 11            | 3   |
|           | Ni      | 1             | 0             | 2         | 1        | 14       | 4        | 0             | 10            | 0   |
|           | Cu      | 92            | 88            | 53        | 12       | 1        | 1        | 31            | 222           | 56  |
|           | Zn      | 663           | 467           | 622       | 139      | 3        | 2        | 134           | 2312          | 412 |
|           | Sn      | 25            | 0             | 63        | 14       | 11       | 3        | 0             | 264           | 6   |
|           | Pb      | 595           | 346           | 938       | 210      | 6        | 3        | 17            | 3300          | 348 |
| Fine Soil | V       | 41            | 39            | 11        | 2        | -1       | 1        | 26            | 61            | 15  |
|           | Cr      | 61            | 53            | 41        | 9        | 2        | 2        | 21            | 177           | 30  |
|           | Mn      | 54            | 51            | 23        | 5        | 2        | 1        | 17            | 119           | 15  |
|           | Co      | 8             | 8             | 3         | 1        | 1        | 1        | 4             | 13            | 2   |
|           | Ni      | 5             | 0             | 7         | 2        | 1        | 1        | 0             | 22            | 10  |
|           | Cu      | 128           | 97            | 79        | 18       | -1       | 1        | 48            | 290           | 129 |
|           | Zn      | 1030          | 760           | 1139      | 255      | 4        | 2        | 136           | 4201          | 823 |
|           | Sn      | 13            | 0             | 29        | 6        | 4        | 2        | 0             | 97            | 0   |
|           | Pb      | 687           | 338           | 1042      | 233      | 7        | 3        | 37            | 4148          | 565 |

## Spearman correlations of major elements

**Table S3a:** Spearman correlations of major elements in bulk dust (top) and fine dust (bottom). Statistical significance ( $p < 0.05$ ) is shown in bold.

|                  | Na | Mg           | Al          | P           | K           | Ca          | Ti    | Fe          |
|------------------|----|--------------|-------------|-------------|-------------|-------------|-------|-------------|
| <b>Bulk Dust</b> | Na | 1            |             |             |             |             |       |             |
|                  | Mg | 0.16         | 1           |             |             |             |       |             |
|                  | Al | <b>-0.45</b> | 0.44        | 1           |             |             |       |             |
|                  | P  | -0.08        | <b>0.52</b> | <b>0.62</b> | 1           |             |       |             |
|                  | K  | <b>0.83</b>  | 0.42        | -0.13       | 0.11        | 1           |       |             |
|                  | Ca | 0.20         | <b>0.94</b> | 0.33        | 0.45        | 0.38        | 1     |             |
|                  | Ti | -0.36        | 0.03        | <b>0.66</b> | 0.41        | -0.24       | 0.01  | 1           |
|                  | Fe | -0.28        | 0.09        | <b>0.63</b> | 0.40        | -0.16       | 0.10  | 0.42        |
| <b>Fine Dust</b> | Na | 1            |             |             |             |             |       |             |
|                  | Mg | -0.08        | 1           |             |             |             |       |             |
|                  | Al | <b>0.46</b>  | <b>0.50</b> | 1           |             |             |       |             |
|                  | P  | 0.34         | <b>0.59</b> | <b>0.71</b> | 1           |             |       |             |
|                  | K  | 0.35         | <b>0.70</b> | <b>0.78</b> | <b>0.87</b> | 1           |       |             |
|                  | Ca | -0.06        | <b>0.95</b> | <b>0.56</b> | <b>0.57</b> | <b>0.73</b> | 1     |             |
|                  | Ti | <b>0.46</b>  | -0.26       | 0.11        | -0.05       | -0.02       | -0.25 | 1           |
|                  | Fe | <b>0.84</b>  | 0.03        | 0.41        | 0.15        | 0.26        | 0.01  | <b>0.65</b> |

**Table S3b:** Spearman correlations of major elements in bulk soil (top) and fine soil (bottom). Statistical significance ( $p < 0.05$ ) is shown in bold.

|                  | Na | Mg          | Al          | P           | K           | Ca          | Ti          | Fe          |
|------------------|----|-------------|-------------|-------------|-------------|-------------|-------------|-------------|
| <b>Bulk Soil</b> | Na | 1           |             |             |             |             |             |             |
|                  | Mg | 0.34        | 1           |             |             |             |             |             |
|                  | Al | -0.02       | -0.25       | 1           |             |             |             |             |
|                  | P  | 0.20        | 0.04        | 0.36        | 1           |             |             |             |
|                  | K  | 0.43        | 0.43        | <b>0.50</b> | <b>0.46</b> | 1           |             |             |
|                  | Ca | 0.37        | <b>0.93</b> | -0.31       | 0.10        | 0.38        | 1           |             |
|                  | Ti | -0.27       | 0.24        | <b>0.54</b> | -0.01       | 0.35        | 0.06        | 1           |
|                  | Fe | 0.04        | 0.31        | <b>0.46</b> | 0.34        | 0.20        | 0.27        | 0.42        |
| <b>Fine Soil</b> | Na | 1           |             |             |             |             |             |             |
|                  | Mg | <b>0.65</b> | 1           |             |             |             |             |             |
|                  | Al | -0.05       | 0.22        | 1           |             |             |             |             |
|                  | P  | 0.09        | 0.22        | -0.04       | 1           |             |             |             |
|                  | K  | 0.21        | <b>0.62</b> | <b>0.48</b> | 0.20        | 1           |             |             |
|                  | Ca | <b>0.59</b> | <b>0.95</b> | 0.07        | 0.15        | <b>0.54</b> | 1           |             |
|                  | Ti | 0.32        | <b>0.64</b> | <b>0.63</b> | -0.09       | <b>0.79</b> | <b>0.54</b> | 1           |
|                  | Fe | 0.42        | <b>0.69</b> | 0.41        | -0.06       | 0.36        | <b>0.64</b> | <b>0.68</b> |

## Elemental concentrations normalized to continental crust (CC) and Wissahickon Formation (WF)

**Table S4:** Mean major and minor element concentrations in bulk and fine dust and soil normalized to continental crust, CC (Rudnick and Gao, 2003) and to the local Wissahickon Formation, WF (Weiss et al., 1949). Minor element data were not available for the WF.

| Element   | Bulk Dust |      | Bulk Soil |      | Fine Dust |      | Fine Soil |      |
|-----------|-----------|------|-----------|------|-----------|------|-----------|------|
|           | CC        | WF   | CC        | WF   | CC        | WF   | CC        | WF   |
| <b>Na</b> | 0.26      | 0.40 | 0.07      | 0.10 | 0.03      | 0.05 | 0.06      | 0.09 |
| <b>Mg</b> | 0.48      | 1.59 | 0.24      | 0.80 | 0.85      | 2.85 | 0.40      | 1.35 |
| <b>Al</b> | 0.04      | 0.05 | 0.07      | 0.08 | 0.05      | 0.06 | 0.09      | 0.10 |
| <b>P</b>  | 1.37      | 1.89 | 5.04      | 6.92 | 2.29      | 3.15 | 6.42      | 8.81 |
| <b>K</b>  | 0.11      | 0.08 | 0.07      | 0.05 | 0.05      | 0.03 | 0.07      | 0.05 |
| <b>Ca</b> | 0.75      | 4.72 | 0.38      | 2.43 | 1.21      | 7.61 | 0.58      | 3.67 |
| <b>Ti</b> | 0.10      | 0.07 | 0.10      | 0.07 | 0.17      | 0.13 | 0.12      | 0.09 |
| <b>Fe</b> | 0.64      | 1.49 | 0.48      | 1.10 | 0.65      | 1.52 | 0.52      | 1.21 |
| <b>V</b>  | 0.30      |      | 0.22      |      | 0.48      |      | 0.30      |      |
| <b>Cr</b> | 0.39      |      | 0.31      |      | 0.98      |      | 0.45      |      |
| <b>Mn</b> | 0.03      |      | 0.05      |      | 0.05      |      | 0.07      |      |
| <b>Co</b> | 0.30      |      | 0.23      |      | 0.26      |      | 0.30      |      |
| <b>Ni</b> | 0.03      |      | 0.02      |      | 0.31      |      | 0.08      |      |
| <b>Cu</b> | 7.56      |      | 3.41      |      | 8.96      |      | 4.74      |      |
| <b>Zn</b> | 4.60      |      | 9.21      |      | 9.92      |      | 14.31     |      |
| <b>Sn</b> | 61.76     |      | 14.71     |      | 98.82     |      | 7.65      |      |
| <b>Pb</b> | 19.00     |      | 54.09     |      | 26.09     |      | 62.45     |      |

## Factor analysis of major elements

**Table S5a:** Factor analysis (varimax rotated) of major elements in bulk dust (left) and fine dust (right). Only factor loadings >0.40 are listed.

| Bulk Dust           | Variable   | Factor 1 | Factor 2 | Factor 3 |
|---------------------|------------|----------|----------|----------|
|                     | Na         |          |          | 0.91     |
|                     | Mg         | 0.99     |          |          |
|                     | Al         |          | 0.94     |          |
|                     | P          | 0.42     | 0.53     |          |
|                     | K          |          |          | 0.89     |
|                     | Ca         | 0.94     |          |          |
|                     | Ti         |          | 0.71     |          |
|                     | Fe         |          | 0.60     |          |
|                     | Eigenvalue | 2.22     | 2.16     | 1.77     |
| Cumulative Variance | 32.99%     | 65.05%   | 91.41%   |          |

| Fine Dust           | Variable   | Factor 1 | Factor 2 | Factor 3 |
|---------------------|------------|----------|----------|----------|
|                     | Na         |          | 0.90     |          |
|                     | Mg         | 0.96     |          |          |
|                     | Al         |          |          | 0.64     |
|                     | P          |          |          | 0.90     |
|                     | K          | 0.53     |          | 0.75     |
|                     | Ca         | 0.93     |          |          |
|                     | Ti         |          | 0.58     |          |
|                     | Fe         |          | 0.98     |          |
|                     | Eigenvalue | 2.39     | 2.27     | 2.06     |
| Cumulative Variance | 32.94%     | 64.27%   | 92.66%   |          |

**Table S5b:** Factor analysis (varimax rotated) of major elements in bulk soil (left) and fine soil (right). Only factor loadings >0.40 are listed.

| Bulk Soil           | Variable   | Factor 1 | Factor 2 | Factor 3 | Factor 4 |
|---------------------|------------|----------|----------|----------|----------|
|                     | Na         |          | 0.41     | -0.44    |          |
|                     | Mg         | 0.98     |          |          |          |
|                     | Al         | -0.42    | 0.54     | 0.40     | 0.51     |
|                     | P          |          | 0.50     |          | 0.43     |
|                     | K          |          | 0.97     |          |          |
|                     | Ca         | 0.94     |          |          |          |
|                     | Ti         |          |          | 0.90     |          |
|                     | Fe         |          |          |          | 0.85     |
|                     | Eigenvalue | 2.25     | 1.73     | 1.30     | 1.23     |
| Cumulative Variance | 32.87%     | 58.15%   | 77.12%   | 95.06%   |          |

| Fine Soil           | Variable   | Factor 1 | Factor 2 | Factor 3 |
|---------------------|------------|----------|----------|----------|
|                     | Na         | 0.62     |          |          |
|                     | Mg         | 0.91     |          |          |
|                     | Al         |          | 0.58     | 0.54     |
|                     | P          |          |          |          |
|                     | K          |          | 0.89     |          |
|                     | Ca         | 0.97     |          |          |
|                     | Ti         |          | 0.81     |          |
|                     | Fe         | 0.57     |          | 0.63     |
|                     | Eigenvalue | 2.75     | 1.99     | 0.93     |
| Cumulative Variance | 42.48%     | 73.25%   | 87.65%   |          |

## Spearman correlations of minor elements

**Table S6a:** Spearman correlations of minor elements in bulk dust (top) and fine dust (bottom). Statistical significance ( $p < 0.05$ ) is shown in bold.

|           | V  | Cr          | Mn           | Co          | Ni          | Cu          | Zn          | Sn    | Pb          |
|-----------|----|-------------|--------------|-------------|-------------|-------------|-------------|-------|-------------|
| Bulk Dust | V  | 1           |              |             |             |             |             |       |             |
|           | Cr | -0.17       | 1            |             |             |             |             |       |             |
|           | Mn | <b>0.67</b> | 0.22         | 1           |             |             |             |       |             |
|           | Co | <b>0.79</b> | -0.26        | <b>0.79</b> | 1           |             |             |       |             |
|           | Ni | 0.30        | 0.32         | <b>0.62</b> | 0.30        | 1           |             |       |             |
|           | Cu | 0.25        | 0.14         | <b>0.65</b> | <b>0.49</b> | <b>0.51</b> | 1           |       |             |
|           | Zn | 0.11        | <b>0.54</b>  | <b>0.59</b> | 0.34        | 0.30        | <b>0.49</b> | 1     |             |
|           | Sn | 0.07        | <b>-0.45</b> | 0.09        | 0.15        | 0.17        | 0.44        | -0.21 | 1           |
|           | Pb | -0.19       | 0.19         | 0.15        | 0.11        | -0.05       | <b>0.48</b> | 0.43  | 0.17        |
| Fine Dust | V  | 1           |              |             |             |             |             |       |             |
|           | Cr | 0.42        | 1            |             |             |             |             |       |             |
|           | Mn | <b>0.48</b> | <b>0.85</b>  | 1           |             |             |             |       |             |
|           | Co | <b>0.84</b> | <b>0.57</b>  | <b>0.71</b> | 1           |             |             |       |             |
|           | Ni | 0.34        | <b>0.89</b>  | <b>0.89</b> | <b>0.54</b> | 1           |             |       |             |
|           | Cu | <b>0.51</b> | <b>0.77</b>  | <b>0.74</b> | <b>0.56</b> | <b>0.70</b> | 1           |       |             |
|           | Zn | 0.32        | <b>0.64</b>  | <b>0.74</b> | <b>0.47</b> | <b>0.69</b> | <b>0.71</b> | 1     |             |
|           | Sn | -0.22       | 0.16         | 0.02        | -0.13       | 0.15        | 0.20        | 0.20  | 1           |
|           | Pb | -0.24       | 0.44         | 0.22        | -0.13       | 0.37        | 0.32        | 0.32  | <b>0.57</b> |



**Table S6b:** Spearman correlations of minor elements in bulk soil (top) and fine soil (bottom). Statistical significance ( $p < 0.05$ ) is shown in bold.

|                  | V                | Cr          | Mn          | Co          | Ni          | Cu          | Zn          | Sn    | Pb          |   |
|------------------|------------------|-------------|-------------|-------------|-------------|-------------|-------------|-------|-------------|---|
| <b>Bulk Soil</b> | V                | 1           |             |             |             |             |             |       |             |   |
|                  | Cr               | 0.41        | 1           |             |             |             |             |       |             |   |
|                  | Mn               | <b>0.85</b> | 0.39        | 1           |             |             |             |       |             |   |
|                  | Co               | <b>0.64</b> | <b>0.46</b> | <b>0.81</b> | 1           |             |             |       |             |   |
|                  | Ni               | 0.16        | 0.44        | 0.18        | 0.18        | 1           |             |       |             |   |
|                  | Cu               | <b>0.45</b> | <b>0.71</b> | 0.36        | 0.21        | <b>0.52</b> | 1           |       |             |   |
|                  | Zn               | -0.10       | 0.27        | -0.08       | 0.01        | 0.37        | 0.31        | 1     |             |   |
|                  | Sn               | 0.43        | 0.15        | 0.06        | -0.22       | 0.13        | 0.43        | -0.06 | 1           |   |
|                  | Pb               | <b>0.46</b> | 0.35        | 0.23        | -0.02       | 0.37        | <b>0.76</b> | 0.32  | <b>0.56</b> | 1 |
|                  | <b>Fine Soil</b> | V           | 1           |             |             |             |             |       |             |   |
| Cr               |                  | <b>0.45</b> | 1           |             |             |             |             |       |             |   |
| Mn               |                  | 0.29        | 0.24        | 1           |             |             |             |       |             |   |
| Co               |                  | 0.41        | 0.39        | <b>0.64</b> | 1           |             |             |       |             |   |
| Ni               |                  | <b>0.50</b> | <b>0.72</b> | 0.33        | <b>0.50</b> | 1           |             |       |             |   |
| Cu               |                  | <b>0.65</b> | <b>0.79</b> | 0.35        | 0.30        | <b>0.82</b> | 1           |       |             |   |
| Zn               |                  | 0.27        | <b>0.66</b> | 0.10        | 0.25        | <b>0.49</b> | <b>0.54</b> | 1     |             |   |
| Sn               |                  | 0.26        | 0.31        | -0.04       | 0.07        | 0.37        | 0.39        | 0.11  | 1           |   |
| Pb               |                  | <b>0.61</b> | 0.41        | 0.20        | 0.05        | <b>0.53</b> | <b>0.76</b> | 0.40  | 0.23        | 1 |

## Factor analysis of minor elements

**Table S7a:** Factor analysis (varimax rotated) of minor elements in bulk dust (left) and fine dust (right). Only factor loadings >0.40 are listed.

| Bulk Dust | Variable            | Factor 1 | Factor 2 | Factor 3 | Factor 4 |
|-----------|---------------------|----------|----------|----------|----------|
|           | V                   | 0.88     |          |          |          |
|           | Cr                  |          | 0.91     |          |          |
|           | Mn                  | 0.78     |          |          | 0.47     |
|           | Co                  | 0.97     |          |          |          |
|           | Ni                  |          |          |          | 0.81     |
|           | Cu                  |          |          | 0.66     | 0.53     |
|           | Zn                  |          | 0.54     | 0.47     |          |
|           | Sn                  |          | -0.67    |          |          |
|           | Pb                  |          |          | 0.81     |          |
|           | Eigenvalue          | 2.61     | 1.68     | 1.55     | 1.38     |
|           | Cumulative Variance | 34.16%   | 56.11%   | 76.36%   | 94.41%   |

| Fine Dust | Variable            | Factor 1 | Factor 2 | Factor 3 |
|-----------|---------------------|----------|----------|----------|
|           | V                   |          | 0.88     |          |
|           | Cr                  | 0.90     |          |          |
|           | Mn                  | 0.89     |          |          |
|           | Co                  | 0.43     | 0.86     |          |
|           | Ni                  | 0.92     |          |          |
|           | Cu                  | 0.81     |          |          |
|           | Zn                  | 0.62     |          |          |
|           | Sn                  |          |          | 0.71     |
|           | Pb                  |          |          | 0.76     |
|           | Eigenvalue          | 3.57     | 1.99     | 1.28     |
|           | Cumulative Variance | 45.92%   | 71.53%   | 88.00%   |

**Table S7b:** Factor analysis (varimax rotated) of minor elements in bulk soil (left) and fine soil (right). Only factor loadings >0.40 are listed.

| Bulk Soil | Variable            | Factor 1 | Factor 2 | Factor 3 | Factor 4 |
|-----------|---------------------|----------|----------|----------|----------|
|           | V                   | 0.87     |          |          | 0.40     |
|           | Cr                  |          |          | 0.80     |          |
|           | Mn                  | 0.95     |          |          |          |
|           | Co                  | 0.86     |          |          |          |
|           | Ni                  |          |          | 0.41     |          |
|           | Cu                  |          | 0.65     | 0.70     |          |
|           | Zn                  |          |          |          |          |
|           | Sn                  |          |          |          | 0.81     |
|           | Pb                  |          | 0.87     |          |          |
|           | Eigenvalue          | 2.58     | 1.58     | 1.47     | 1.03     |
|           | Cumulative Variance | 35.03%   | 56.42%   | 76.32%   | 90.25%   |

| Fine Soil | Variable            | Factor 1 | Factor 2 | Factor 3 |
|-----------|---------------------|----------|----------|----------|
|           | V                   |          | 0.63     |          |
|           | Cr                  | 0.81     |          |          |
|           | Mn                  |          |          | 0.62     |
|           | Co                  |          |          | 0.97     |
|           | Ni                  | 0.77     |          |          |
|           | Cu                  | 0.81     | 0.57     |          |
|           | Zn                  | 0.45     |          |          |
|           | Sn                  | 0.41     |          |          |
|           | Pb                  |          | 0.89     |          |
|           | Eigenvalue          | 2.51     | 1.75     | 1.62     |
|           | Cumulative Variance | 34.28%   | 58.12%   | 80.36%   |
